# Supplementary material
Source: PubMed Central journal article supplement (PMC6511392)
Supplement: NIHMS1018664-supplement-Mellors_et_al_-_Supplementary_Material.pdf [file NIHMS1018664-supplement-Mellors_et_al_-_Supplementary_Material.pdf]

**Supplementary Table S1. Bacterial strains**

| Recipient |          |                   | Donor   |          |                   | Capsule switch mutant |          |                        |
|-----------|----------|-------------------|---------|----------|-------------------|-----------------------|----------|------------------------|
| Strain    | Serotype | Capsule size (bp) | Strain  | Serotype | Capsule size (bp) | Mutant                | Serotype | Total samples prepared |
| 106.66    | 6B       | 17506             | NA      | NA       | NA                | NA                    | 6B       | 3                      |
| 106.66    | 6B       | 17506             | 106.66  | 6B       | 17506             | 106.66cps106.66       | 6B       | 3                      |
| 106.66    | 6B       | 17506             | B101.77 | 14       | 19918             | 106.66cpsB101.77      | 14       | 6                      |
| 106.66    | 6B       | 17506             | 201.38  | 9V       | 20856             | 106.66cps201.38       | 9V       | 3                      |
| 106.66    | 6B       | 17506             | 109.74  | 9V       | 20856             | 106.66cps109.74       | 9V       | 3                      |
| 106.66    | 6B       | 17506             | 207.31  | 15       | 18626             | 106.66cps207.31       | 15       | 6                      |
| 106.66    | 6B       | 17506             | 307.14  | 18C      | 21819             | 106.66cps307.14       | 18C      | 6                      |
| 106.66    | 6B       | 17506             | 103.57  | 23F      | 22330             | 106.66cps103.57       | 23F      | 6                      |
| 106.66    | 6B       | 17506             | 108.34  | 19F      | 19798             | 106.66cps108.34       | 19F      | 2                      |
| 106.66    | 6B       | 17506             | 201.47  | 19F      | 19798             | 106.66cps201.47       | 19F      | 2                      |
| 106.66    | 6B       | 17506             | B201.73 | 19F      | 19798             | 106.66cpsB201.73      | 19F      | 2                      |

**Supplementary Table S2. Modified lacks medium reagents, modified from [1]**

| Component                              | Amount/liter |
|----------------------------------------|--------------|
| casamino acids                         | 1.25 g       |
| casein hydrolysate                     | 0.25 g       |
| tryptophan                             | 1.5 mg       |
| cysteine HCl                           | 10 mg        |
| asparagine                             | 12.5 mg      |
| glutamine                              | 2.5 mg       |
| choline HCl                            | 5 mg         |
| adenine                                | 5 mg         |
| sodium acetate                         | 2 g          |
| K <sub>2</sub> HPO <sub>4</sub>        | 8.5 g        |
| MgCl <sub>2</sub> · 6 H <sub>2</sub> O | 0.5 g        |
| CaCl <sub>2</sub>                      | 0.6 mg       |
| MnSO <sub>4</sub> · 4 H <sub>2</sub> O | 0.2 mg       |
| FeSO <sub>4</sub> · 7 H <sub>2</sub> O | 0.5 mg       |
| CuSO <sub>4</sub> · 5 H <sub>2</sub> O | 0.5 mg       |
| ZnSO <sub>4</sub> · 7 H <sub>2</sub> O | 0.5 mg       |
| NaHCO <sub>3</sub>                     | 0.4 g        |
| Biotin                                 | 0.6 µg       |
| nicotinic acid                         | 0.3 mg       |
| pyridoxine·HCl                         | 0.3 mg       |
| thiamine·HCl                           | 0.3 mg       |
| Riboflavin                             | 0.14 mg      |
| calcium pantothenate                   | 1.2 mg       |
| Sucrose                                | 3.423 g      |
| catalase from bovine liver (Sigma)     | 12000 units  |

pH

adjusted to 7.3

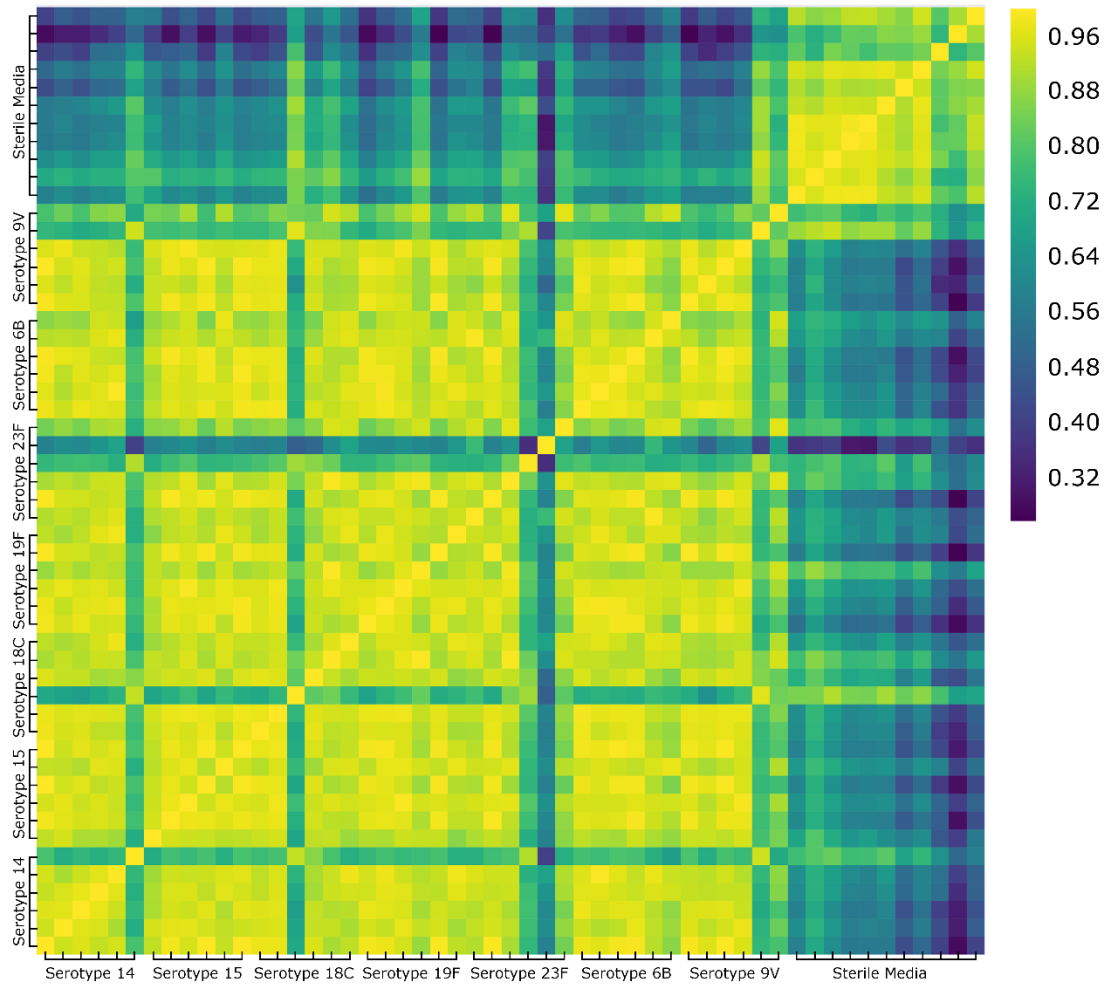

**Supplementary Figure S1.** Spearman's rank correlation between samples when considering the 13 core molecules found to be statistically different between the aggregated *S. pneumoniae* cultures and sterile media.

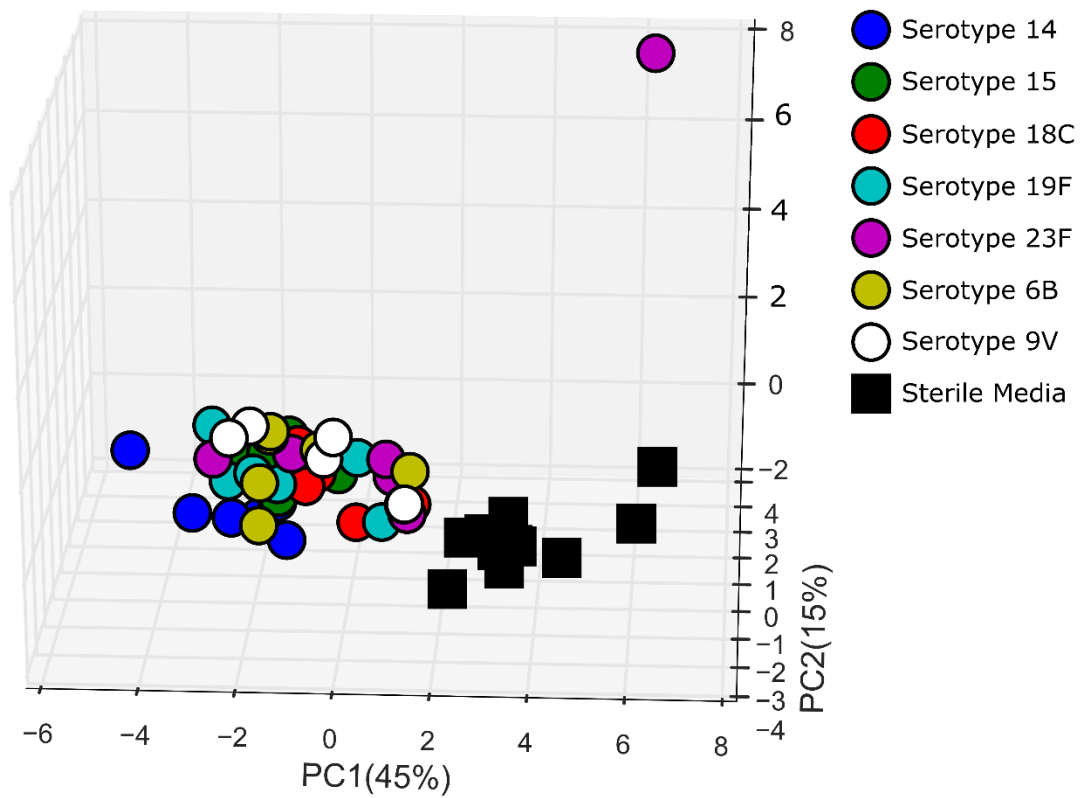

**Supplementary Figure S2.** Principal component analysis (PCA) of *S. pneumoniae* culture and sterile media samples when considering the 13 statistically significant molecules. Strep samples are labeled by serotype.

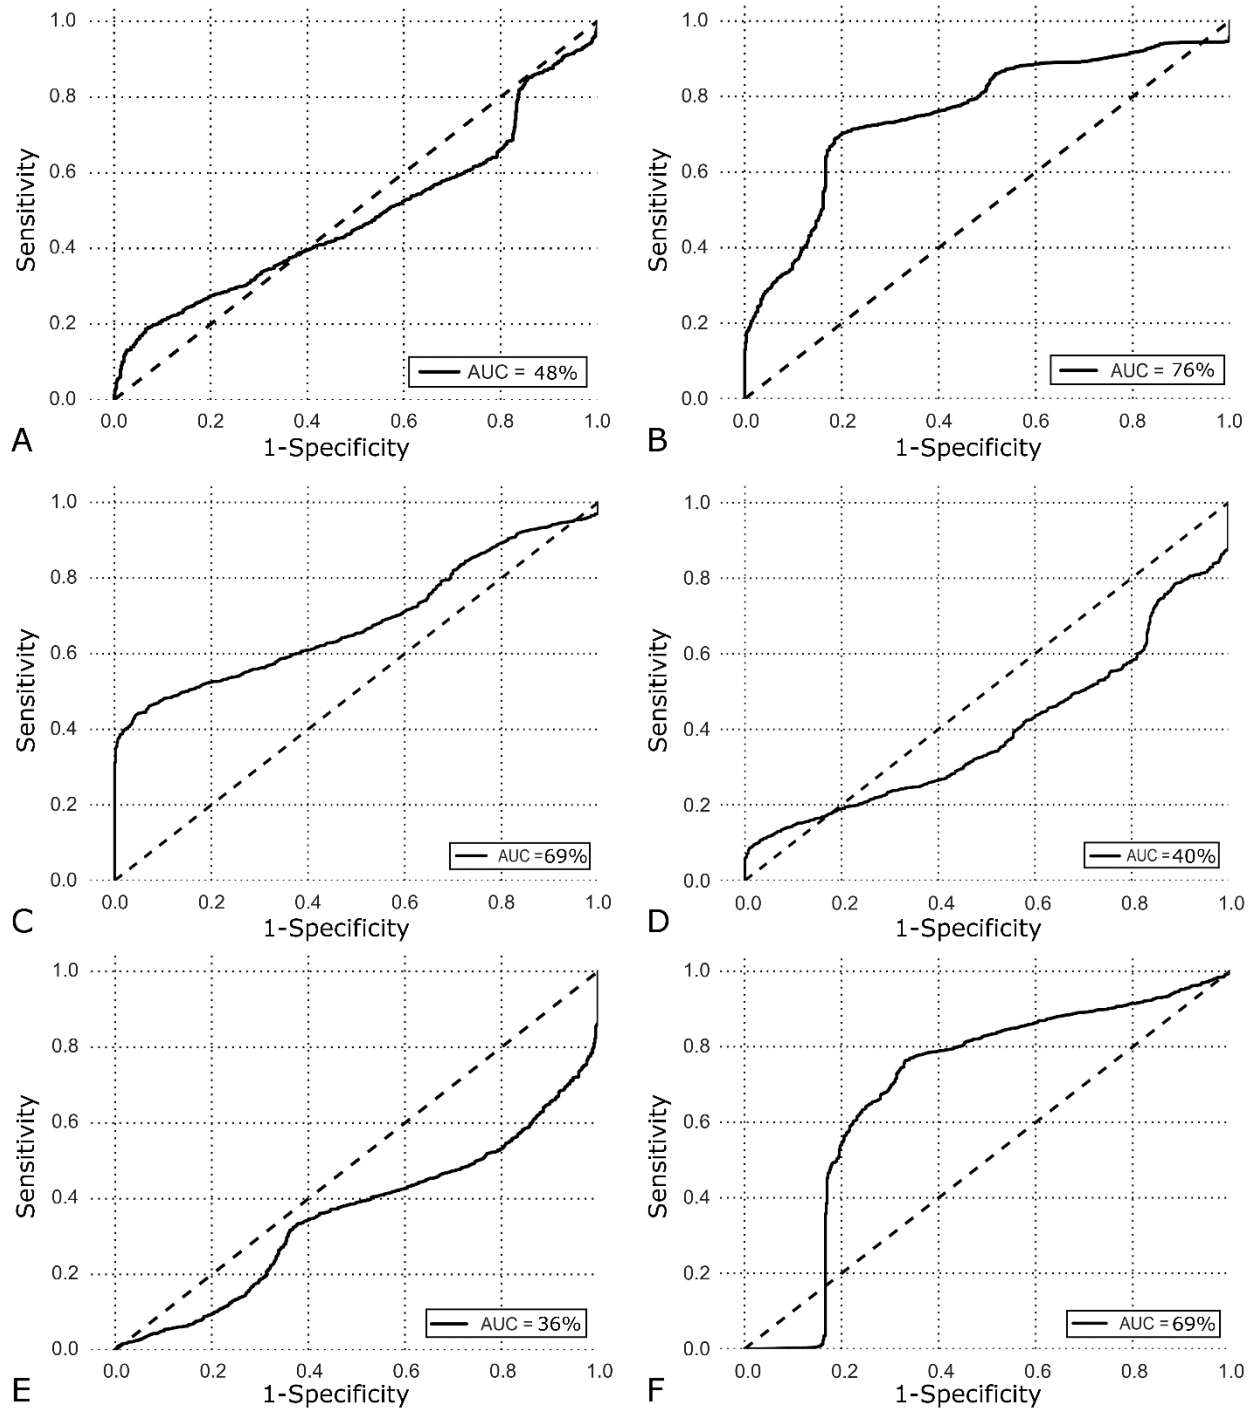

**Supplementary Figure S3.** Receiver operating characteristic (ROC) curve showing the discriminatory efficacy for differentiating A) serotype 23F from serotypes 14, 15, 18C, 19F, 9V and 6B; B) Serotype 15 from serotypes 14, 23F, 18C, 19F, 9V and 6B; C) serotype 6B from serotypes 14, 23F, 15, 18C, 19F and 9V; D) serotype 19F from serotypes 14, 23F, 15, 18C, 9V and 6B; E) serotype 9V from serotypes 14, 15, 18C, 19F, 23F and 6B; F) serotype 18C from serotypes 14, 15, 23F, 19F, 9V and 6B.

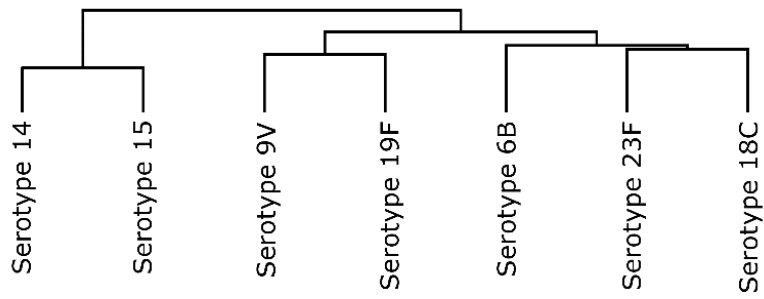

**Supplementary Figure S4.** Hierarchical clustering analysis of *S. pneumoniae* capsular polysaccharide locus based on the presence and absence of capsule genes for serotypes 14, 15, 6B, 9V, 18C, 19F and 23F.

## References

1. Lacks, S., *Integration efficiency and genetic recombination in pneumococcal transformation*. *Genetics*, 1966. **53**(1): p. 207.
